# Supplementary material for: Real-World Evidence on Disease Burden and Economic Impact of Sickle Cell Disease in Italy
Source: MDPI journal article supplement (doi:10.3390/jcm12010117), 2022-12-23
Supplement: s1 [file s1]

## Supplementary Tables

**Table S1.** International Classification of Diseases, Ninth Revision, Clinical Modification (ICD-9-CM) diagnosis codes of sickle cell disease forms

| Types of sickle cell disease form        | ICD-9-Codes |
|------------------------------------------|-------------|
| Sickle-cell thalassemia without crisis   | 282.41      |
| Sickle-cell thalassemia with crisis      | 282.42      |
| Sickle-cell disease, unspecified         | 282.60      |
| Hb-SS disease without crisis             | 282.61      |
| Hb-SS disease with crisis                | 282.62      |
| Sickle-cell/Hb-C disease without crisis  | 282.63      |
| Sickle-cell/Hb-C disease with crisis     | 282.64      |
| Other sickle-cell disease without crisis | 282.68      |
| Other sickle-cell disease with crisis    | 282.69      |
| Sickle-cell trait*                       | 282.5       |

\*not included in the analysis

**Table S2.** List of SCD treatments in analysis

| Category                        | Classes/Drugs                                   | Anatomical Therapeutic Chemical (ATC) codes |
|---------------------------------|-------------------------------------------------|---------------------------------------------|
| SCD specific treatment          | Hydroxyurea                                     | L01XX05                                     |
| SCD related drugs               | Antibacterials for systemic use                 | J01                                         |
|                                 | Anti-inflammatory products                      | M01                                         |
|                                 | Analgesics                                      | N02                                         |
| SCD-complications related drugs | Drugs for functional gastrointestinal disorders | A03                                         |
|                                 | Antiemetics and antinauseants                   | A04                                         |
|                                 | Bile and liver therapy                          | A05                                         |
|                                 | vitamin D and analogues                         | A11CC                                       |
|                                 | Antithrombotic agents                           | B01                                         |
|                                 | Antianemic preparations                         | B03                                         |
|                                 | Albumin                                         | B05AA01                                     |
|                                 | Cardiovascular system                           | C                                           |
|                                 | Drugs used in erectile dysfunction              | G04BE                                       |
|                                 | Testosterone-5-alpha reductase inhibitors       | G04CB                                       |
|                                 | Corticosteroids for systemic use                | H02                                         |
|                                 | Antimycotics for systemic use                   | J02                                         |
|                                 | Immune sera and immunoglobulins                 | J06                                         |
|                                 | immunosuppressants                              | L04                                         |
|                                 | Muscle relaxants                                | M03                                         |
|                                 | Drugs for treatment of bone diseases            | M05                                         |
|                                 | Drugs for obstructive airway diseases           | R03                                         |

|                                                           |       |
|-----------------------------------------------------------|-------|
| Corticosteroids, plain                                    | S01BA |
| Anti-neovascularisation agents                            | S01LA |
| Iron chelating agents                                     | V03AC |
| Drugs for treatment of hyperkalemia and hyperphosphatemia | V03AE |

**Table S3.** International Classification of Diseases, Ninth Revision, Clinical Modification (ICD-9-CM) diagnosis codes of sickle cell related complications.

| Systems                | Types of diseases                 | ICD-9-Codes                                                   |
|------------------------|-----------------------------------|---------------------------------------------------------------|
| <b>Cerebrovascular</b> | Stroke                            | 430, 431, 433.x1, 434.x1, 436.x                               |
|                        | Transient ischemic attack         | 435.x                                                         |
|                        | Seizures                          | 345.0x-345.5x, 345.7x-345.9x, 780.39                          |
| <b>Hepatic</b>         | Bilirubinemia                     | 782.4                                                         |
|                        | Gallstones                        | 574.x                                                         |
|                        | Cholecystitis                     | 574.00, 574.01, 574.30, 574.31, 574.60, 574.61, 575.0, 575.1x |
|                        | Biliary sludge                    | 576.8                                                         |
|                        | Acute choledocholithiasis         | 574.5x                                                        |
|                        | Acute hepatic sequestration       | 573.8                                                         |
|                        | Acute intrahepatic cholestasis    | 576.8                                                         |
| <b>Renal</b>           | Hematuria                         | 599.7x, 791.2                                                 |
|                        | Proteinuria                       | 791.0                                                         |
|                        | Nephrolithiasis                   | 592.x, 594.x, 788.0, 274.11                                   |
|                        | Polyuria                          | 788.42                                                        |
|                        | Renal insufficiency               | 593.9, 585.9                                                  |
|                        | Glomerulonephritis                | 580.x, 582.x                                                  |
| <b>Pulmonary</b>       | Pneumococcal pneumonia            | 481                                                           |
|                        | Pulmonary embolism                | 673.2x, 673.8x, 415.1                                         |
|                        | Pulmonary hypertension            | 416.0                                                         |
|                        | Acute Chest Syndrome              | 517.3                                                         |
|                        | Asthma                            | 493.0–493.9                                                   |
| <b>Spleen</b>          | Splenic sequestration             | 289.52                                                        |
|                        | Hypersplenism                     | 289.4                                                         |
| <b>Other</b>           | Retinopathy                       | 362.1                                                         |
|                        | Leg ulcers                        | 707.1x                                                        |
|                        | Obstructive sleep apnea           | 327.23                                                        |
|                        | Aseptic (Avascular) bone necrosis | 733.4                                                         |
|                        | Deep Vein Thrombosis/Thrombosis   | 444.x, 451-453, 671.3, 671.4, 671.9                           |
|                        | Hand foot syndrome (Dactylitis)   | 282.62, 282.64, 282.69                                        |
